# Supplementary material for: Nonlinear electrophoresis of dielectric and metal spheres in a nematic liquid crystal
Source: Springer Nature journal article supplement (doi:10.1038/nature09427), 2010-10-01
Supplement: 41586_2010_BFnature09427_MOESM28_ESM.pdf [file 41586_2010_BFnature09427_MOESM28_ESM.pdf]

**Supplementary Figure S1.**

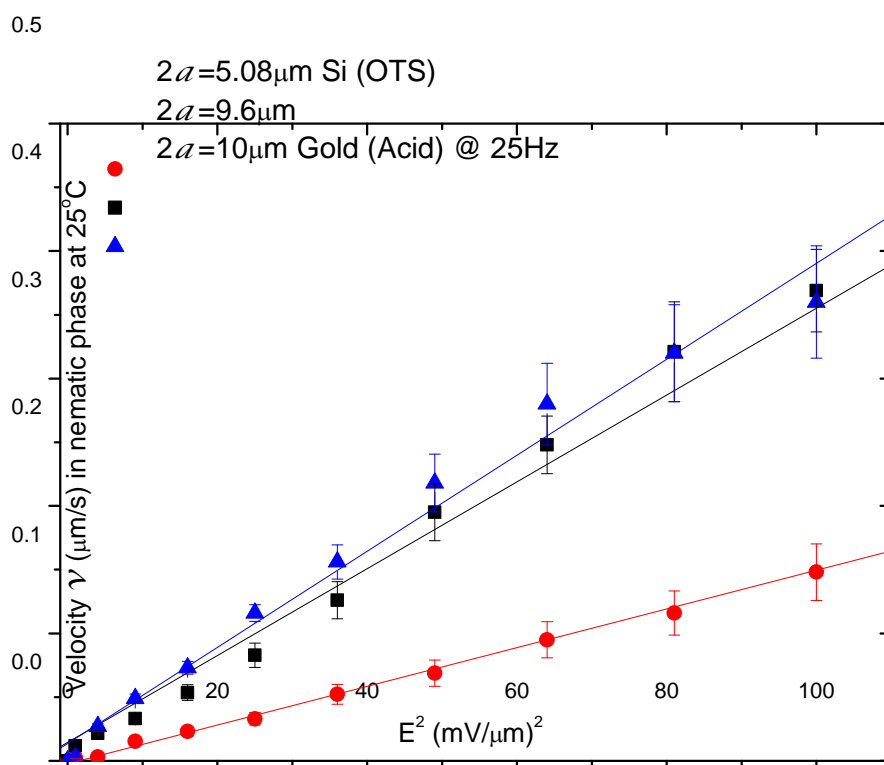

**Fig.S1.** Electrophoretic velocity  $v$  vs  $E^2$  for sinusoidal field of frequency 25Hz;  $p_x > 0$ ; OTS-coated silica spheres with  $2a = 5.08\mu\text{m}$  (circles), OTS-coated borosilicate spheres with  $2a = 9.6\mu\text{m}$  (squares) and gold spheres with  $2a = 10\mu\text{m}$  (triangles), moving in E7.

<sup>1</sup> Liquid Crystal Institute and Chemical Physics Interdisciplinary Program, Kent State University, Kent OH, 44242.

**Supplementary Video for Figure 2b.** This movie shows the motion of silica spheres (5 $\mu\text{m}$  diameter) coated with OTS. The host is E7 LC with  $\Delta\epsilon=13.8$ . When the symmetric ac field of 45 mV/ $\mu\text{m}$  (100Hz) is applied parallel to the director, spheres with elastic dipole  $p_x>0$  will move to the right, while spheres with  $p_x<0$  will move in opposite direction. The average velocity of particles is 2.3  $\mu\text{m/s}$ . (QuickTime; 1.2 MB).

**Supplementary Video for figure 2d.** This movie shows the motion of borosilicate spheres (17 $\mu\text{m}$  diameter) coated with DDMAC. The host is a mixture of 13.45 wt% of E7 in MLC 7026-00 with  $\Delta\epsilon=0.03$ . When the symmetric ac field of 30 mV/ $\mu\text{m}$  (1Hz) is applied parallel to the director, spheres with elastic dipole  $p_x>0$  will move to the left, while spheres with  $p_x<0$  will move in opposite direction. The average velocity of particles is 4.6  $\mu\text{m/s}$ . (QuickTime; 0.6 MB).
